# Supplementary material for: TDP-43 Accumulation Within Intramuscular Nerve Bundles of Patients With Amyotrophic Lateral Sclerosis
Source: PubMed Central journal article supplement (PMC9127711; doi:10.1001/jamaneurol.2022.1113), 2022-05-23
Supplement: jamaneurol-e221113-s001.pdf [file jamaneurol-e221113-s001.pdf]

## Supplementary Online Content

Kurashige T, Morino H, Murao T, et al. TDP-43 accumulation within intramuscular nerve bundles of patients with amyotrophic lateral sclerosis. *JAMA Neurol*. Published online May 23, 2022.

doi:10.1001/jamaneurol.2022.1113

**eFigure 1.** Immunofluorescent Reactivity Against pTDP-43 in Muscle Tissues of Patients in the Postmortem Study

**eFigure 2.** Immunofluorescent Reactivity Against TDP-43 in Muscle Tissues of Patients in the Postmortem Study

**eFigure 3.** Immunofluorescent Reactivity Against FUS in Muscle Tissues of Patients in the Postmortem Study

**eFigure 4.** Immunofluorescent Reactivity Against SQSTM1/p62 in Muscle Tissues of Patients in the Postmortem Study

**eFigure 5.** Immunofluorescent Reactivity Against Ub in Muscle Tissues of Patients in the Postmortem Study

**eFigure 6.** Comparison of the Percentage of Intramuscular Nerve Bundles With Axonal pTDP-43 Accumulations Among Autopsy-Confirmed Patients

**eFigure 7.** Immunofluorescent Reactivity Against pTDP-43 in Muscle Tissues of Patients in the Muscle Biopsy Cohort

**eFigure 8.** Percentage of Patients Receiving a Final ALS Diagnosis Among the 3 Groups

**eFigure 9.** Percentage of Nerve Bundles Containing Axonal pTDP-43 Accumulations and Clinical Category at Muscle Biopsy for Groups A and B

**eTable.** Clinical and Pathological Characteristics of Patients in the Postmortem Study

This supplementary material has been provided by the authors to give readers additional information about their work.

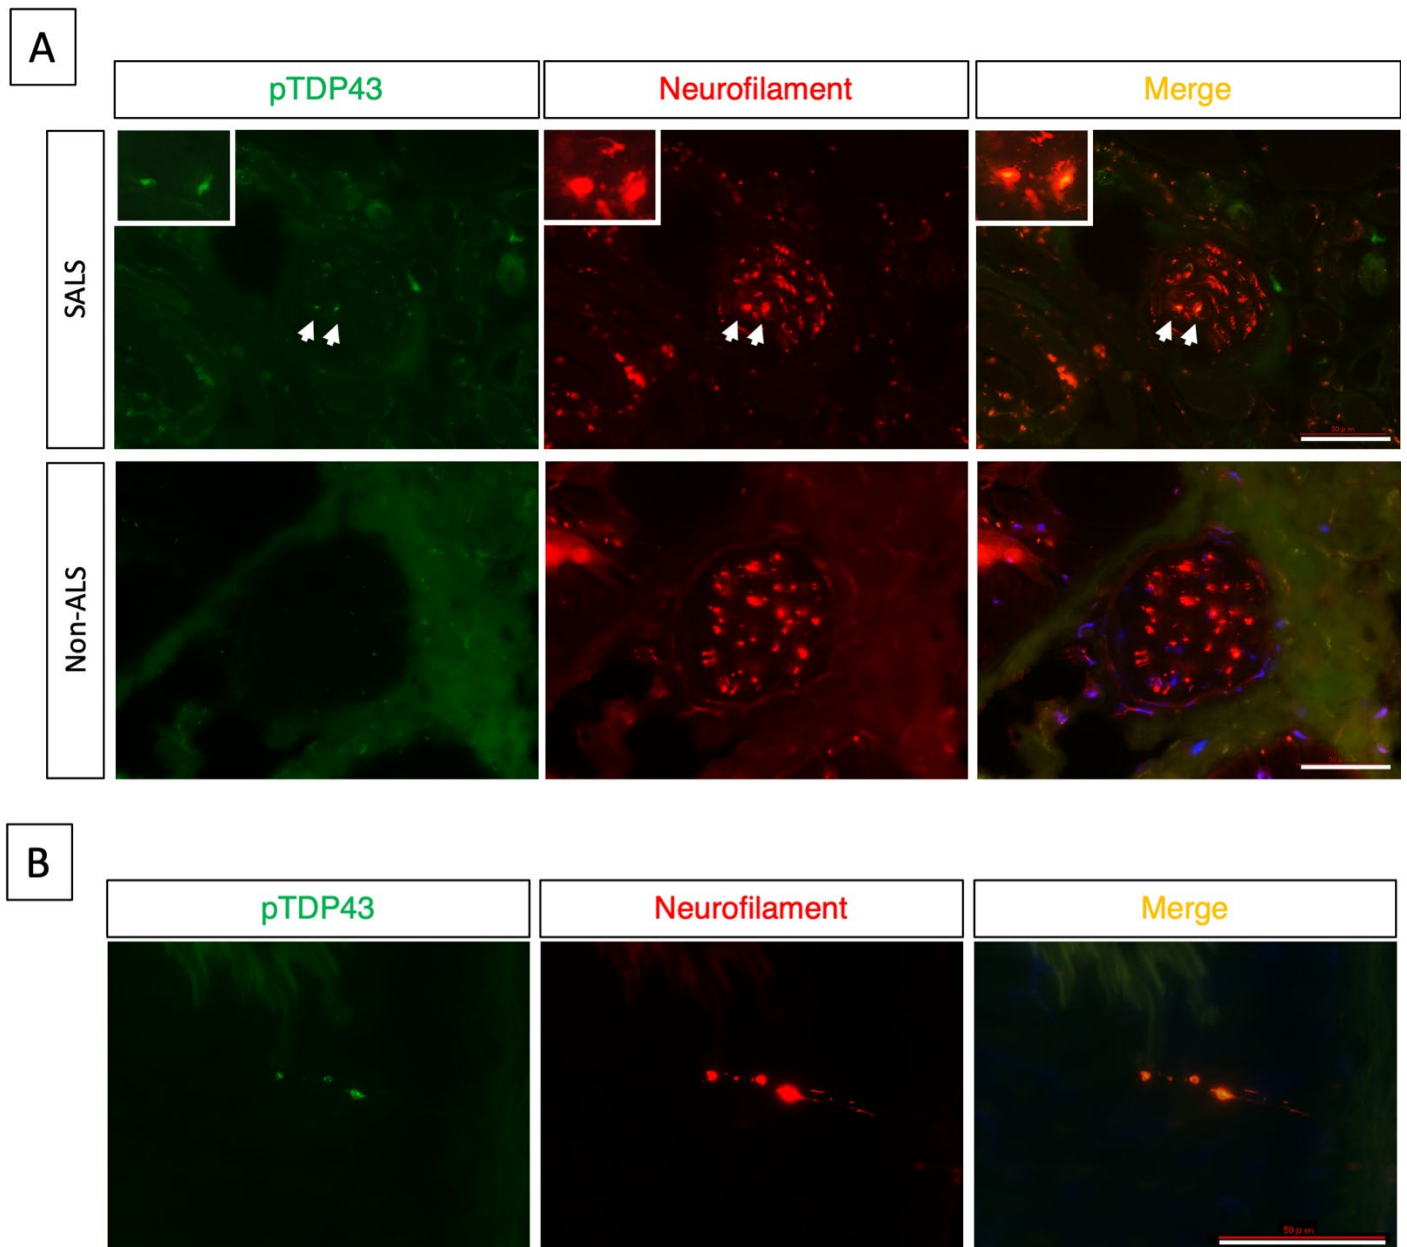

**eFigure 1.** Immunofluorescent Reactivity Against pTDP-43 in Muscle Tissues of Patients in the Postmortem Study

Immunofluorescent study showed that the muscle tissues of autopsy-confirmed ALS patients presented axonal accumulations stained with the mouse monoclonal antibody against pTDP43 (arrow) in intramuscular nerve bundles (A) and peripheral axons (B).

Scale Bars: 50  $\mu$ m

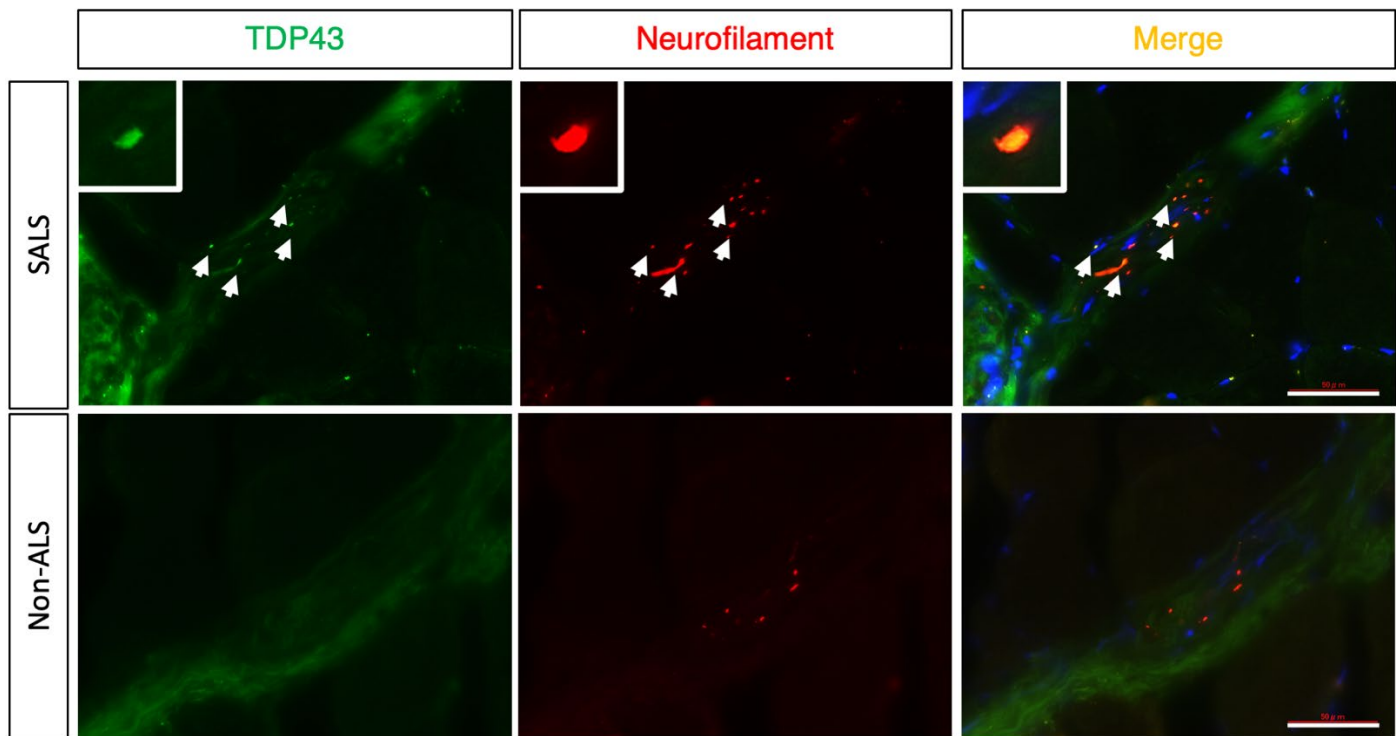

**eFigure 2.** Immunofluorescent Reactivity Against TDP-43 in Muscle Tissues of Patients in the Postmortem Study  
 Immunofluorescent study showed that the muscle tissues of autopsy-confirmed ALS patients presented axonal accumulations stained with the rabbit polyclonal antibody against TDP43 (arrow) in intramuscular nerve bundles.  
 Scale Bars: 50  $\mu$ m

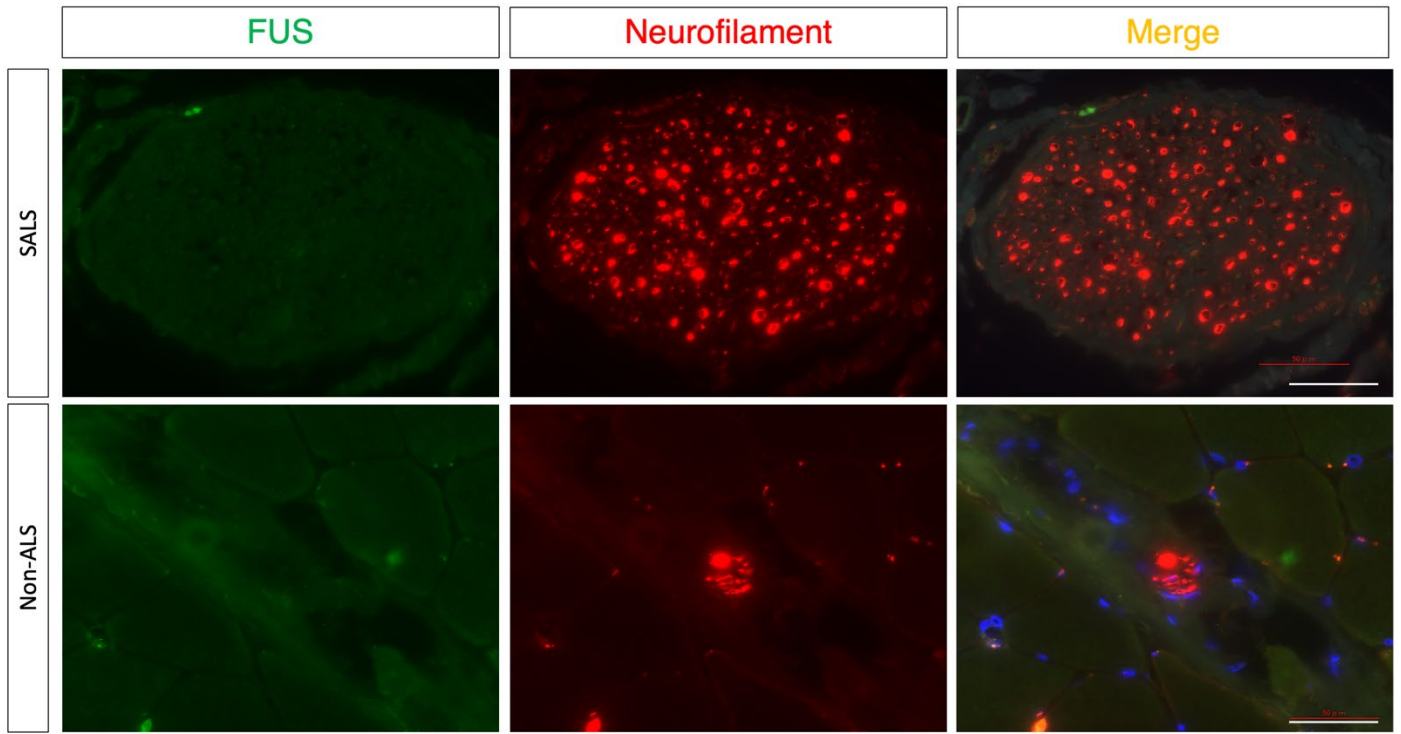

**eFigure 3.** Immunofluorescent Reactivity Against FUS in Muscle Tissues of Patients in the Postmortem Study  
 Immunofluorescent study showed that the muscle tissues of autopsy-confirmed patients with SALS and non-ALS diseases did not show any accumulations of FUS.

Scale Bars: 50  $\mu$ m

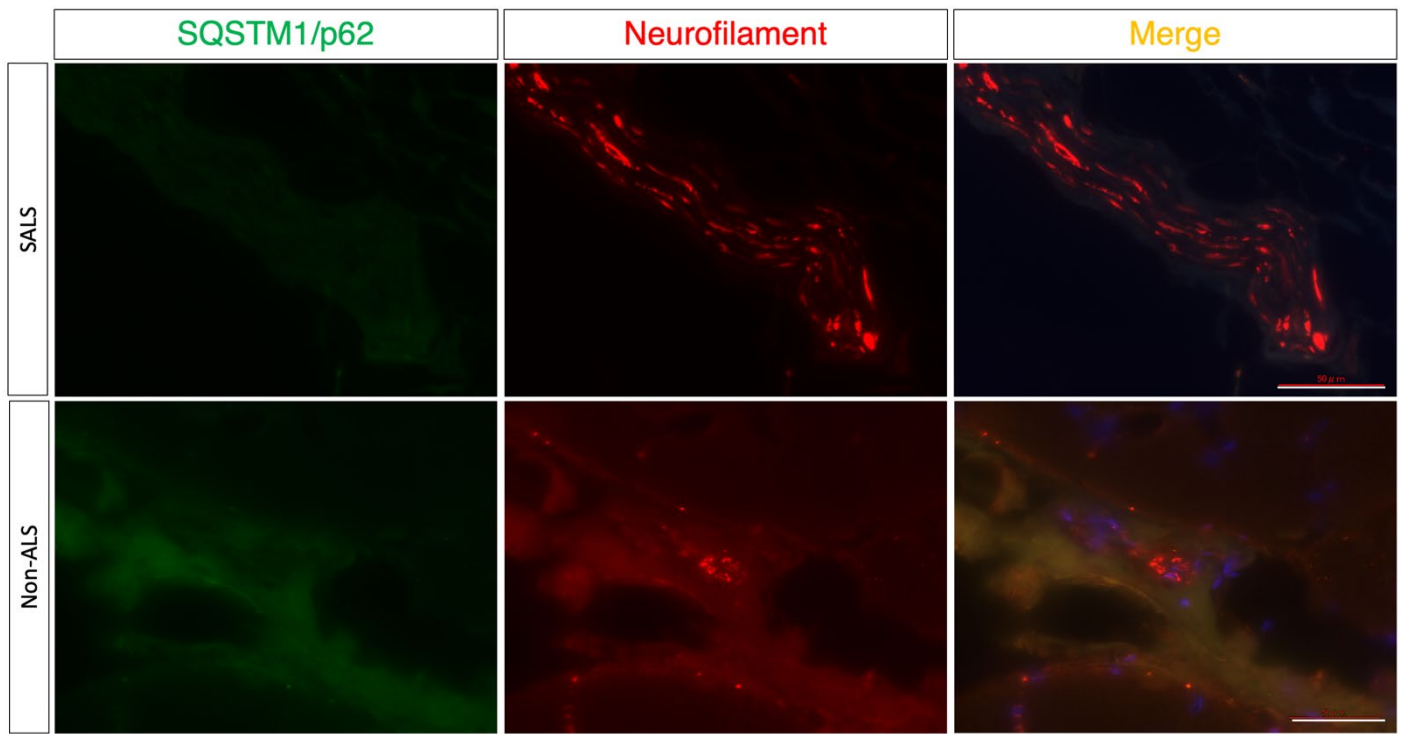

**eFigure 4.** Immunofluorescent Reactivity Against SQSTM1/p62 in Muscle Tissues of Patients in the Postmortem Study

Immunofluorescent study showed that the muscle tissues of autopsy-confirmed patients with SALS and non-ALS diseases did not show any accumulations of SQSTM1/p62.

Scale Bars: 50  $\mu$ m

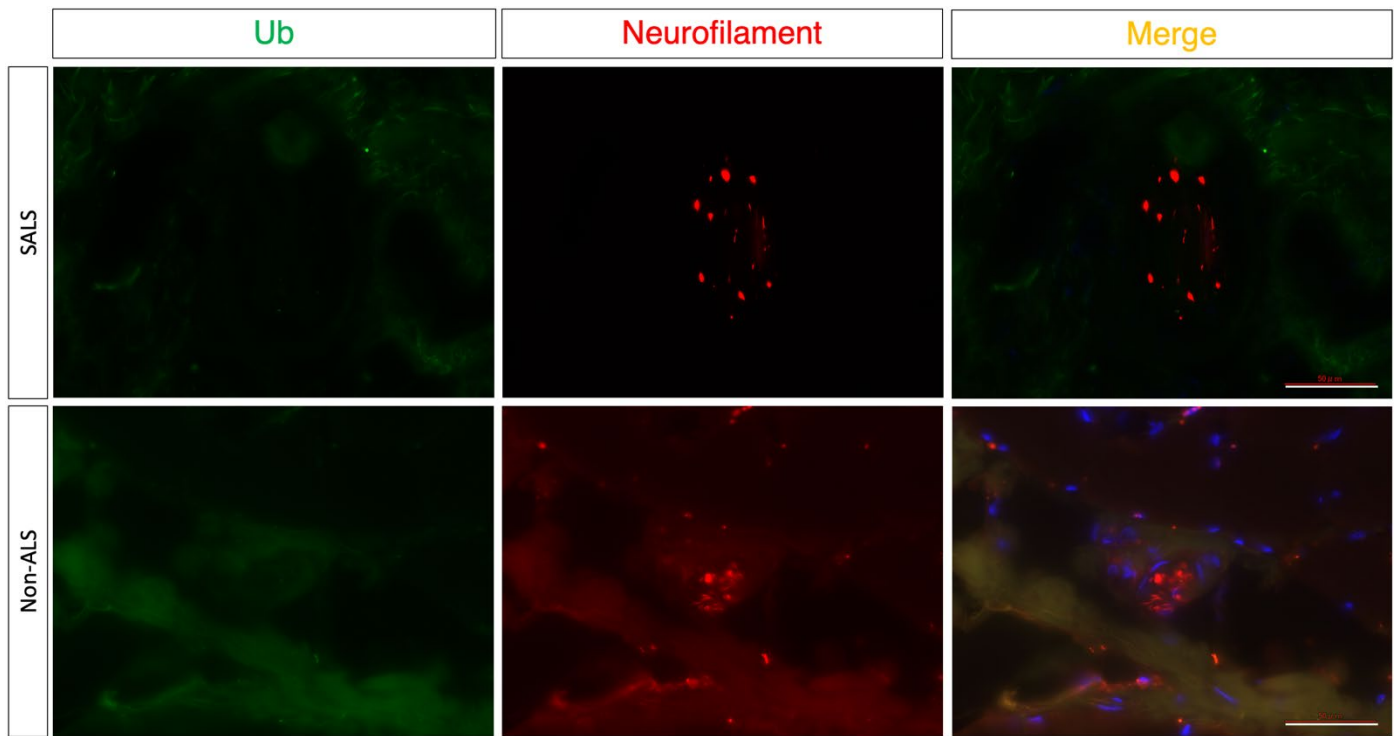

**eFigure 5.** Immunofluorescent Reactivity Against Ub in Muscle Tissues of Patients in the Postmortem Study  
 Immunofluorescent study showed that the muscle tissues of autopsy-confirmed patients with SALS and non-ALS diseases did not show any accumulations of Ub.

Scale Bars: 50  $\mu$ m

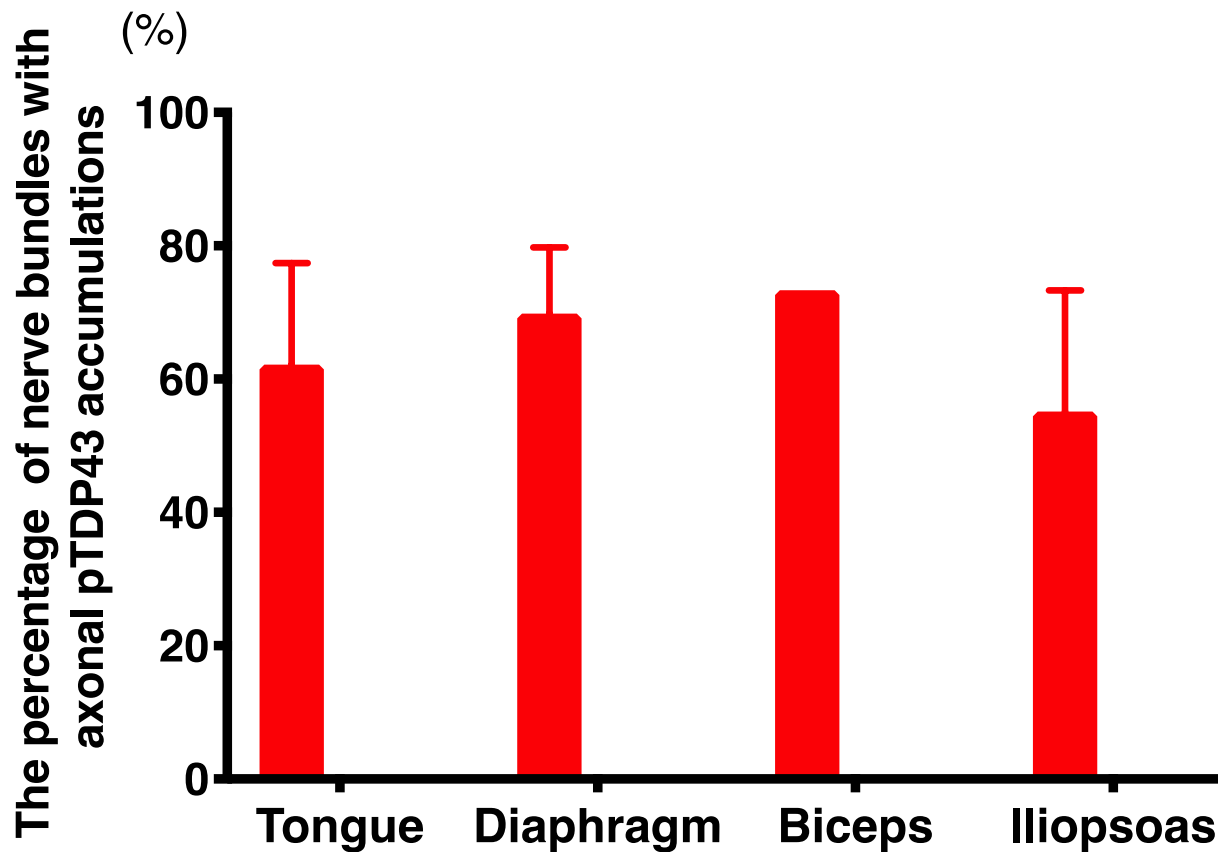

|           |        |        |       |        |
|-----------|--------|--------|-------|--------|
| ■ ALS     | n = 10 | n = 10 | n = 1 | n = 10 |
| ■ Non-ALS | n = 4  | n = 12 | n = 3 | n = 12 |

**eFigure 6.** Comparison of the Percentage of Intramuscular Nerve Bundles With Axonal pTDP-43 Accumulations Among Autopsy-Confirmed Patients

Comparison of the percentage of intramuscular nerve bundles with axonal pTDP43 accumulations among autopsy-confirmed patients. No significant difference was observed among the four types of muscles examined in this study ( $P = 0.149$ ).



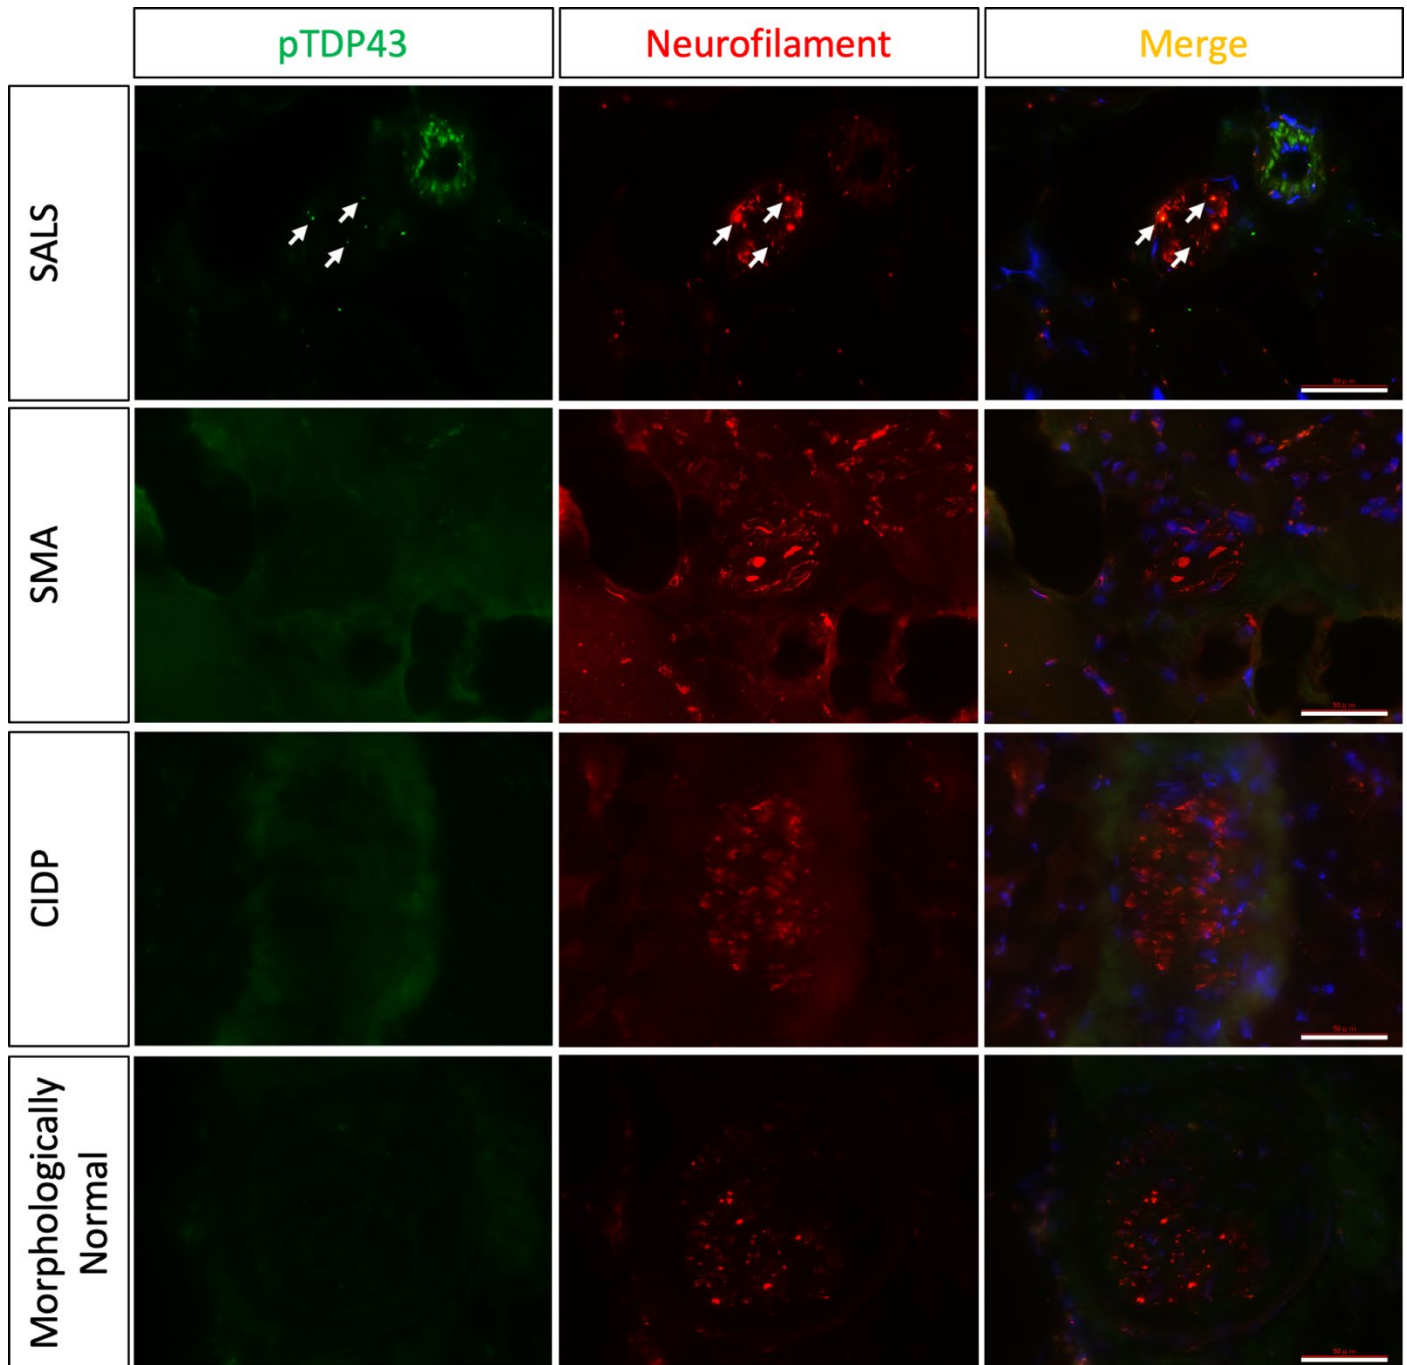

**eFigure 7.** Immunofluorescent Reactivity Against pTDP-43 in Muscle Tissues of Patients in the Muscle Biopsy Cohort

Immunofluorescent study for pTDP43 in muscle biopsy specimens. pTDP43-positive accumulations in intramuscular nerve bundles were colocalized with axons stained by an anti-neurofilament antibody (arrow) in patients whose clinical symptoms were categorized in probable or definite ALS and diagnosed as SALS finally.

Scale Bars: 50  $\mu$ m



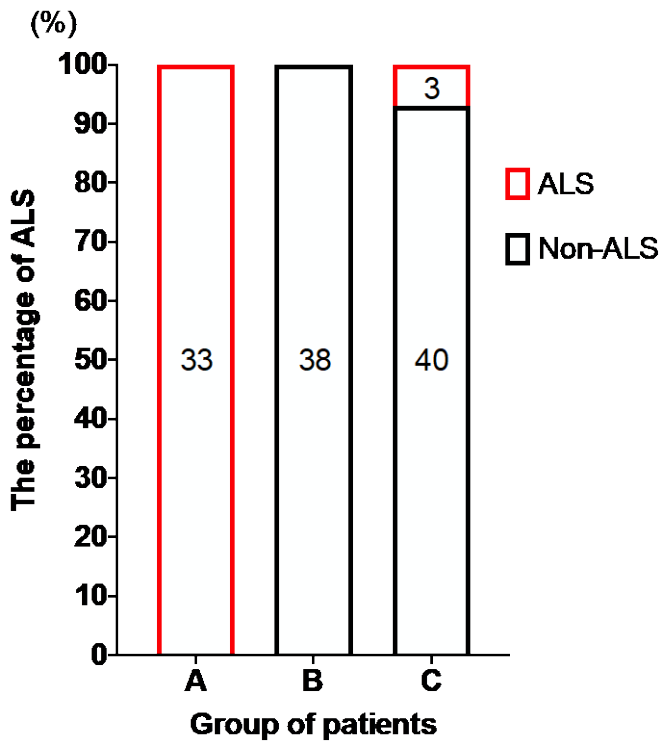

Figure 8. Percentage of Patients Receiving a Final ALS Diagnosis Among the 3 Groups  
Percentage of patients receiving a final ALS diagnosis among the three groups.

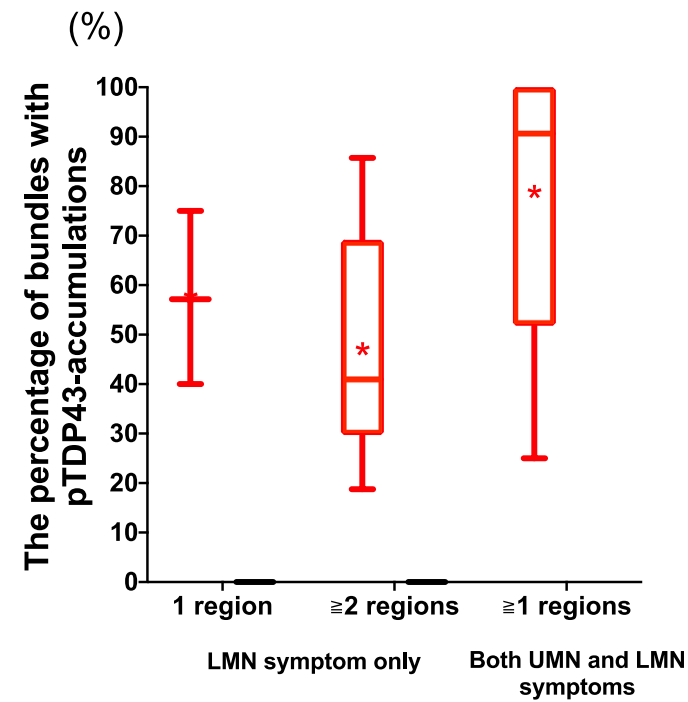

|         |        |        |        |
|---------|--------|--------|--------|
| ALS     | n = 3  | n = 6  | n = 24 |
| Non-ALS | n = 16 | n = 22 | n = 0  |

**eFigure 9.** Percentage of Nerve Bundles Containing Axonal pTDP-43 Accumulations and Clinical Category at Muscle Biopsy for Groups A and B

Percentage of nerve bundles containing axonal pTDP43 accumulations and clinical category at muscle biopsy for Groups A and B. Among ALS patients, the percentage of nerve bundles containing axonal pTDP43-positive accumulations significantly increased with UMN symptoms at the same body region of LMN symptoms at muscle biopsy ( $p = 0.0050$ ). Non-ALS patients did not show any pTDP43-positive accumulations. Asterisks indicate mean values; bars inside boxes indicate median values.

**eTable.** Clinical and Pathological Characteristics of Patients in the Postmortem Study

| Case   | Postmortem diagnosis    | Clinical diagnosis of ALS subtype | Sex | Age at death (y.o.) | Disease Duration (mo) | pTDP43 positive nerve bundles / all bundles (%) |              |              |              |
|--------|-------------------------|-----------------------------------|-----|---------------------|-----------------------|-------------------------------------------------|--------------|--------------|--------------|
|        |                         |                                   |     |                     |                       | Tongue                                          | Diaphragm    | Biceps       | Iliopsoas    |
| SALS1  | ALS with TDP pathology  | bulbar                            | M   | mid-60s             | 6                     | 26/41 (63.4)                                    | 43/68 (63.2) | n.e.         | 5/8 (62.5)   |
| SALS2  | ALS with TDP pathology  | frail arm                         | M   | late 80s            | 6                     | 33/56 (58.9)                                    | 51/70 (72.8) | n.e.         | 8/14 (57.1)  |
| SALS3  | ALS with TDP pathology  | frail arm                         | M   | late 80s            | 7                     | 18/42 (42.9)                                    | 60/71 (84.5) | 11/15 (73.3) | 6/14 (42.9)  |
| SALS4  | ALS with TDP pathology  | lower                             | M   | early 70s           | 14                    | 39/56 (69.6)                                    | 37/51 (72.5) | n.e.         | 11/17 (64.7) |
| SALS5  | ALS with TDP pathology  | frail arm                         | M   | early 60s           | 15                    | 27/57 (47.4)                                    | 34/66 (51.5) | n.e.         | 7/19 (36.8)  |
| SALS6  | ALS with TDP pathology  | bulbar                            | M   | early 80s           | 16                    | 41/51 (80.4)                                    | 45/55 (81.8) | n.e.         | 10/13 (76.9) |
| SALS7  | ALS with TDP pathology  | bulbar                            | F   | mid-70s             | 24                    | 32/37 (86.5)                                    | 45/67 (67.2) | n.e.         | 6/18 (33.3)  |
| SALS8  | ALS with TDP pathology  | bulbar                            | M   | early 70s           | 32                    | 36/51 (70.6)                                    | 34/44 (77.3) | n.e.         | 5/11 (45.5)  |
| SALS9  | ALS with TDP pathology  | lower                             | F   | early 80s           | 110                   | 5/12 (41.7)                                     | 7/11 (63.6)  | n.e.         | 8/9 (88.9)   |
| SALS10 | ALS with TDP pathology  | bulbar                            | M   | mid-70s             | 19                    | 23/38 (60.5)                                    | 14/22 (63.6) | n.e.         | 3/7 (42.9)   |
| Cont1  | Paraneoplastic syndrome |                                   | M   | mid-50s             |                       | 0/62 (0.0)                                      | 0/20 (0.0)   | 0/28 (0.00)  | 0/13 (0.0)   |
| Cont2  | normal (AMI)            |                                   | M   | mid-60s             |                       | n.e.                                            | 0/23 (0.0)   | n.e.         | 0/14 (0.0)   |
| Cont3  | Parkinson disease       |                                   | M   | early 80s           |                       | 0/41 (0.0)                                      | 0/36 (0.0)   | 0/36 (0.0)   | 0/12 (0.0)   |
| Cont4  | CNS lymphoma            |                                   | M   | mid-80s             |                       | 0/36 (0.0)                                      | 0/18 (0.0)   | n.e.         | 0/16 (0.0)   |
| Cont5  | SAH                     |                                   | M   | late 40s            |                       | n.e.                                            | 0/16 (0.0)   | n.e.         | 0/19 (0.0)   |
| Cont6  | Parkinson disease       |                                   | M   | early 60s           |                       | 0/47 (0.0)                                      | 0/28 (0.0)   | n.e.         | 0/13 (0.0)   |
| Cont7  | AQP4-positive NMO/D     |                                   | M   | early 60s           |                       | n.e.                                            | 0/33 (0.0)   | n.e.         | 0/11 (0.0)   |
| Cont8  | Subdural hematoma       |                                   | M   | early 80s           |                       | n.e.                                            | 0/34 (0.0)   | n.e.         | 0/14 (0.0)   |

|        |                     |  |   |              |  |      |             |      |             |
|--------|---------------------|--|---|--------------|--|------|-------------|------|-------------|
| Cont9  | Cerebral<br>infarct |  | M | mid-<br>70s  |  | n.e. | 0/25 ( 0.0) | n.e. | 0/ 9 ( 0.0) |
| Cont10 | Cerebral<br>infarct |  | M | late 70s     |  | n.e. | 0/22 ( 0.0) | n.e. | 0/10 ( 0.0) |
| Cont11 | CBD                 |  | M | mid-<br>70s  |  | n.e. | 0/28 ( 0.0) | n.e. | 0/16 ( 0.0) |
| Cont12 | PSP                 |  | M | early<br>80s |  | n.e. | 0/51 ( 0.0) | n.e. | 0/21 ( 0.0) |

Abbreviations: ALS, amyotrophic lateral sclerosis; SALS, sporadic ALS; Cont, control; TDP, TAR DNA-binding protein (TARDBP) encoding TAR DNA-binding protein 43; pTDP43, phosphorylated TDP43; AMI, acute myocardial infarction; CNS, central nervous system; SAH, subarachnoidal hemorrhage; AQP4, aquaporin-4; NMOSD, neuromyelitis optica spectrum disorder; CBD, corticobasal degeneration; PSP, progressive supranuclear pulsy
